# Supplementary material
Source: ML conference proceedings conference paper supplement (https://openreview.net/forum?id=rmg0qMKYRQ)
Supplement: supplementary_material [file attachment]

# Appendix

## Table of Contents

|                                                             |           |
|-------------------------------------------------------------|-----------|
| <b>A Background on diffusion models</b>                     | <b>13</b> |
| <b>B Muse as a classifier</b>                               | <b>14</b> |
| <b>C Limitations</b>                                        | <b>14</b> |
| <b>D Image attribution</b>                                  | <b>15</b> |
| <b>E Details on ResNet-50 training with diffusion noise</b> | <b>15</b> |
| <b>F Additional plots for model-vs-human benchmark</b>      | <b>16</b> |
| <b>G Quantitative benchmark scores and rankings</b>         | <b>16</b> |

## A BACKGROUND ON DIFFUSION MODELS

Diffusion models (Sohl-Dickstein et al., 2015; Ho et al., 2020; Song et al., 2020; Song & Ermon, 2020) are latent variable generative models defined by a forward and reverse Markov chain. Given an unknown data distribution,  $q(\mathbf{x}_0)$ , over observations,  $\mathbf{x}_0 \in \mathbb{R}^d$ , the forward process corrupts the data into a sequence of noisy latent variables,  $\mathbf{x}_{1:T} := \{\mathbf{x}_1, \mathbf{x}_2, \dots, \mathbf{x}_T\}$ , by gradually adding Gaussian noise with a fixed schedule defined as:

$$q(\mathbf{x}_{1:T}|\mathbf{x}_0) := \prod_{t=1}^T q(\mathbf{x}_t|\mathbf{x}_{t-1}) \quad (3)$$

where  $q(\mathbf{x}_t|\mathbf{x}_{t-1}) := \text{Normal}(\mathbf{x}_t; \sqrt{1-\beta_t}\mathbf{x}_{t-1}, \beta_t\mathbf{I})$ . The reverse Markov process gradually denoises the latent variables to the data distribution with learned Gaussian transitions starting from  $\text{Normal}(\mathbf{x}_T; 0, \mathbf{I})$  i.e.

$$p_{\theta}(\mathbf{x}_{0:T}) := p(\mathbf{x}_T) \cdot \prod_{t=0}^{T-1} p_{\theta}(\mathbf{x}_{t-1}|\mathbf{x}_t)$$

$p_{\theta}(\mathbf{x}_{t-1}|\mathbf{x}_t) := \text{Normal}(\mathbf{x}_{t-1}; \boldsymbol{\mu}_{\theta}(\mathbf{x}_t, t), \boldsymbol{\Sigma}_{\theta}(\mathbf{x}_t, t))$ . The aim of training is for the forward process distribution  $\{\mathbf{x}_t\}_{t=0}^T$  to match that of the reverse process  $\{\tilde{\mathbf{x}}_t\}_{t=0}^T$  i.e., the generative model  $p_{\theta}(\mathbf{x}_0)$  closely matches the data distribution  $q(\mathbf{x}_0)$ . Specifically, these models can be trained by optimizing the variational lower bound of the marginal likelihood (Ho et al., 2020; Kingma et al., 2021):

$$-\log p_{\theta}(\mathbf{x}_0) \leq -\text{VLB}(\mathbf{x}_0) := \mathcal{L}_{\text{Prior}} + \mathcal{L}_{\text{Recon}} + \mathcal{L}_{\text{Diffusion}}$$

$\mathcal{L}_{\text{Prior}}$  and  $\mathcal{L}_{\text{Recon}}$  are the prior and reconstruction loss that can be estimated using standard techniques in the literature (Kingma & Welling, 2014). The (re-weighted) diffusion loss can be written as:

$$\mathcal{L}_{\text{Diffusion}} = \mathbb{E}_{\mathbf{x}_0, \varepsilon, t} \left[ \|\mathbf{w}_t \|\mathbf{x}_0 - \tilde{\mathbf{x}}_{\theta}(\mathbf{x}_t, t)\|_2^2 \right]$$

with  $\mathbf{x}_0 \sim q(\mathbf{x}_0)$ ,  $\varepsilon \sim \text{Normal}(0, \mathbf{I})$ , and  $t \sim \mathcal{U}([0, T])$ . Here,  $\mathbf{w}_t$  is a weight assigned to the timestep, and  $\tilde{\mathbf{x}}_{\theta}(\mathbf{x}_t, t)$  is the model’s prediction of the observation  $\mathbf{x}_0$  from the noised observation  $\mathbf{x}_t$ . Diffusion models can be conditioned on additional inputs like class labels, text prompts, segmentation masks or low-resolution images, in which case  $\tilde{\mathbf{x}}_{\theta}$  also takes a conditioning signal  $\mathbf{y}$  as input.

## B MUSE AS A CLASSIFIER

In Figure 8, we visualize why we were not able to include Muse as a (successful) classifier in our experiments. Even on clean, undistorted images Muse achieved only approximately chance-level accuracy. This may, however, just be a limitation on how we attempted to extract classification decisions out of the model; it is very well possible that other approaches might work better.

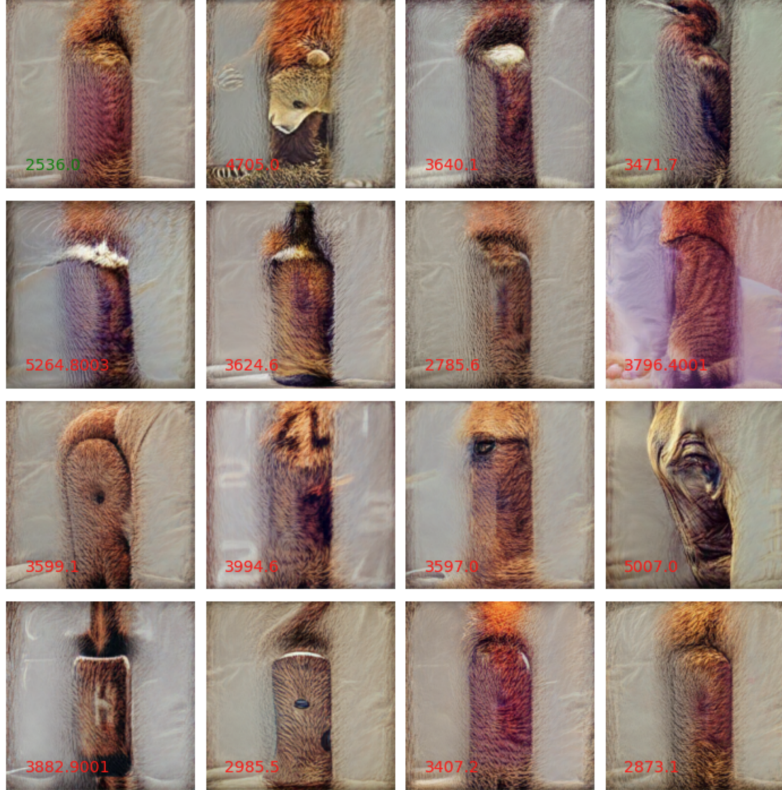

Figure 8: **Why Muse is a poor classifier.** This figure illustrates why Muse reconstructions cannot be used for classification. Given a starting image of a bottle with bear texture, we here plot 16 reconstructions each prompted with a different label. The  $\mathcal{L}_2$  distance to the original image is shown in red for all categories except the one with the lowest distance (here: top left), for which the distance is plotted in green. The images with the lowest distance (row 1 column 1: airplane; row 2 column 3: car, row 4 column 4: truck) appear to be categories for which the model is unable to generate a realistic reconstruction, and thus simply sticks close to the original image. The image generated by prompting with the correct shape category (bottle) is shown in row 2 column 2. Since Muse returns images fairly close to the original one if it is not able to generate a realistic reconstruction, the approach of measuring distance between original and reconstruction is not a feasible classification approach for Muse.

## C LIMITATIONS

As mentioned in the introduction, using a generative model comes with advantages and disadvantages: potentially better generalization currently comes at the cost of being slower computationally compared to standard discriminative models. While this doesn’t matter much for the purpose of analyses, it is a big drawback in practical applications and any approaches that improve speed would be most welcome—in particular, generating at least one prediction (i.e., image generation) per class as we currently do is both expensive and slow.

Furthermore, the models we investigate all differ from another in more than one ways. For instance, their training data, architecture, and training procedure is not identical, thus any differences between

the models cannot currently be attributed to a single factor. That said, through the inclusion of a set of diverse models covering pixel-based diffusion, latent space diffusion, and autoregressive models we seek to at least cover a variety of generative classifiers in order to ensure that the conclusions we draw are not limited to a narrow set of generative models.

## D IMAGE ATTRIBUTION

### Rabbit-duck image:

Attribution: Unknown source, Public domain, via Wikimedia Commons.

Link: <https://upload.wikimedia.org/wikipedia/commons/9/96/Duck-Rabbit.png>

### Rock image:

Attribution: Mirabeau, CC BY-SA 3.0, via Wikimedia Commons.

Link: [https://commons.wikimedia.org/wiki/File:Visage\\_dans\\_un\\_rocher.jpg](https://commons.wikimedia.org/wiki/File:Visage_dans_un_rocher.jpg)

### Vegetable portrait image:

Attribution: Giuseppe Arcimboldo, Public domain, via Wikimedia Commons.

Link: [https://upload.wikimedia.org/wikipedia/commons/4/49/Arcimboldo\\_Vegetables.jpg](https://upload.wikimedia.org/wikipedia/commons/4/49/Arcimboldo_Vegetables.jpg)

### Woman image:

Attribution: W. E. Hill, Public domain, via Wikimedia Commons.

Link: [https://upload.wikimedia.org/wikipedia/commons/5/5f/My\\_Wife\\_and\\_My\\_Mother-In-Law\\_%28Hill%29.svg](https://upload.wikimedia.org/wikipedia/commons/5/5f/My_Wife_and_My_Mother-In-Law_%28Hill%29.svg)

## E DETAILS ON RESNET-50 TRAINING WITH DIFFUSION NOISE

We trained a ResNet-50 in exactly the same way as for standard, 90 epoch ImageNet training with the key difference that we added diffusion noise as described by the code below. Since this makes the training task substantially more challenging, we trained the model for 300 instead of 90 epochs. The learning rate was 0.1 with a cosine learning rate schedule, SGD momentum of 0.9, weight decay of 0.0001, and a per device batch size of 64. For diffusion style denoising we used a flag named “sqrt\_alphas” which ensures that the noise applied doesn’t completely destroy the image information in most cases. We did not optimize any of those settings with respect to any of the observed findings (e.g., shape bias) since we were interested in generally applicable results.

Listing 1: Python example of how diffusion noise was added as a data augmentation technique.

*# Copyright 2023 XXXXX REDACTED FOR ANONYMITY XXXXX*  
*#SPDX-License-Identifier: Apache-2.0*

```
import dataclasses
from typing import Sequence, Tuple
import grain.tensorflow as tf_grain
import jax
import tensorflow as tf

@dataclasses.dataclass(frozen=True)
class AddNoise(tf_grain.MapTransform):
    """Adds diffusion-style noise to the image."""
    sqrt_alphas: bool = True

    def map(self, features: FlatFeatures) -> FlatFeatures:
        image = features["image"]
        alpha = tf.random.uniform([])
        if self.sqrt_alphas:
            alpha = tf.sqrt(alpha)
        std = tf.sqrt(1 - alpha * alpha)
```

```

image = image * alpha + std * tf.random.normal(image.shape)
features["image"] = image
features["noise_level"] = std
return features

```

## F ADDITIONAL PLOTS FOR MODEL-VS-HUMAN BENCHMARK

We here plot detailed performance for all models with respect to a few different properties of interest / metrics:

- Aggregated performance across 17 datasets: Figure 9
- Out-of-distribution accuracy: Figure 10 for parametric datasets and Figure 11 for nonparametric datasets
- Model-to-human error consistency: Figure 10
- Human-to-human, model-to-model error consistency (for nonparametric datasets): Figures 6 and 14 to 17
- Shape bias: Figure 12 and Figure 13

All metrics are based on the model-vs-human toolbox and explained in more detail in (Geirhos et al., 2021).

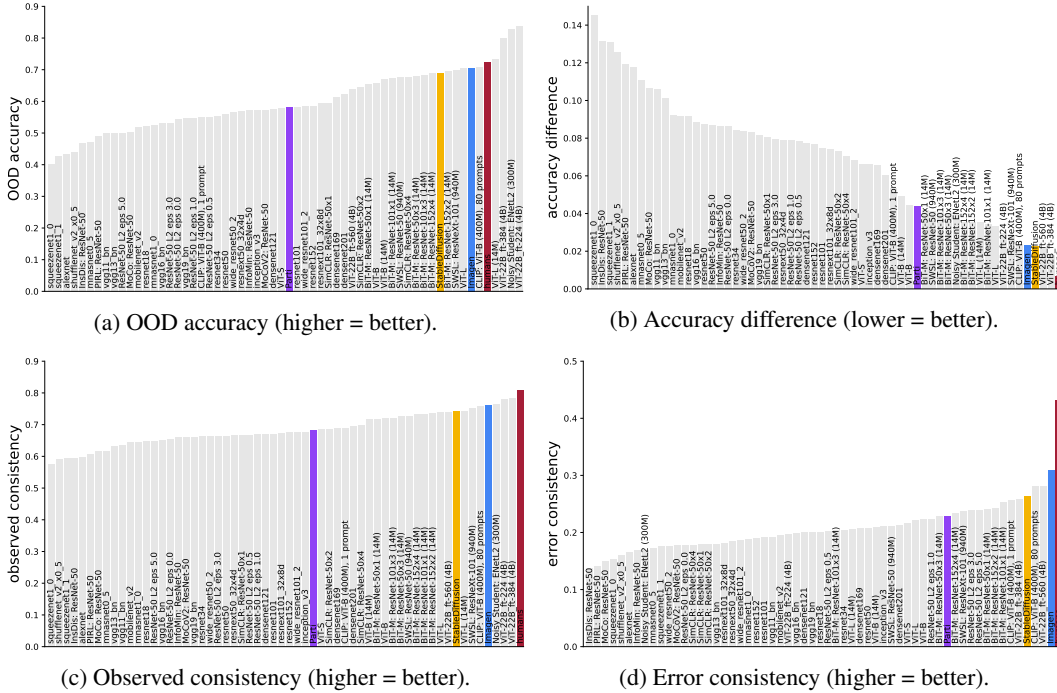

Figure 9: Benchmark results for different models, aggregated over datasets.

## G QUANTITATIVE BENCHMARK SCORES AND RANKINGS

Table 2 and Table 3 list the detailed performance aggregated across 17 datasets for each model, with the former focusing on metrics related to “most human-like object recognition behavior” and the latter focusing on out-of-distribution accuracy.

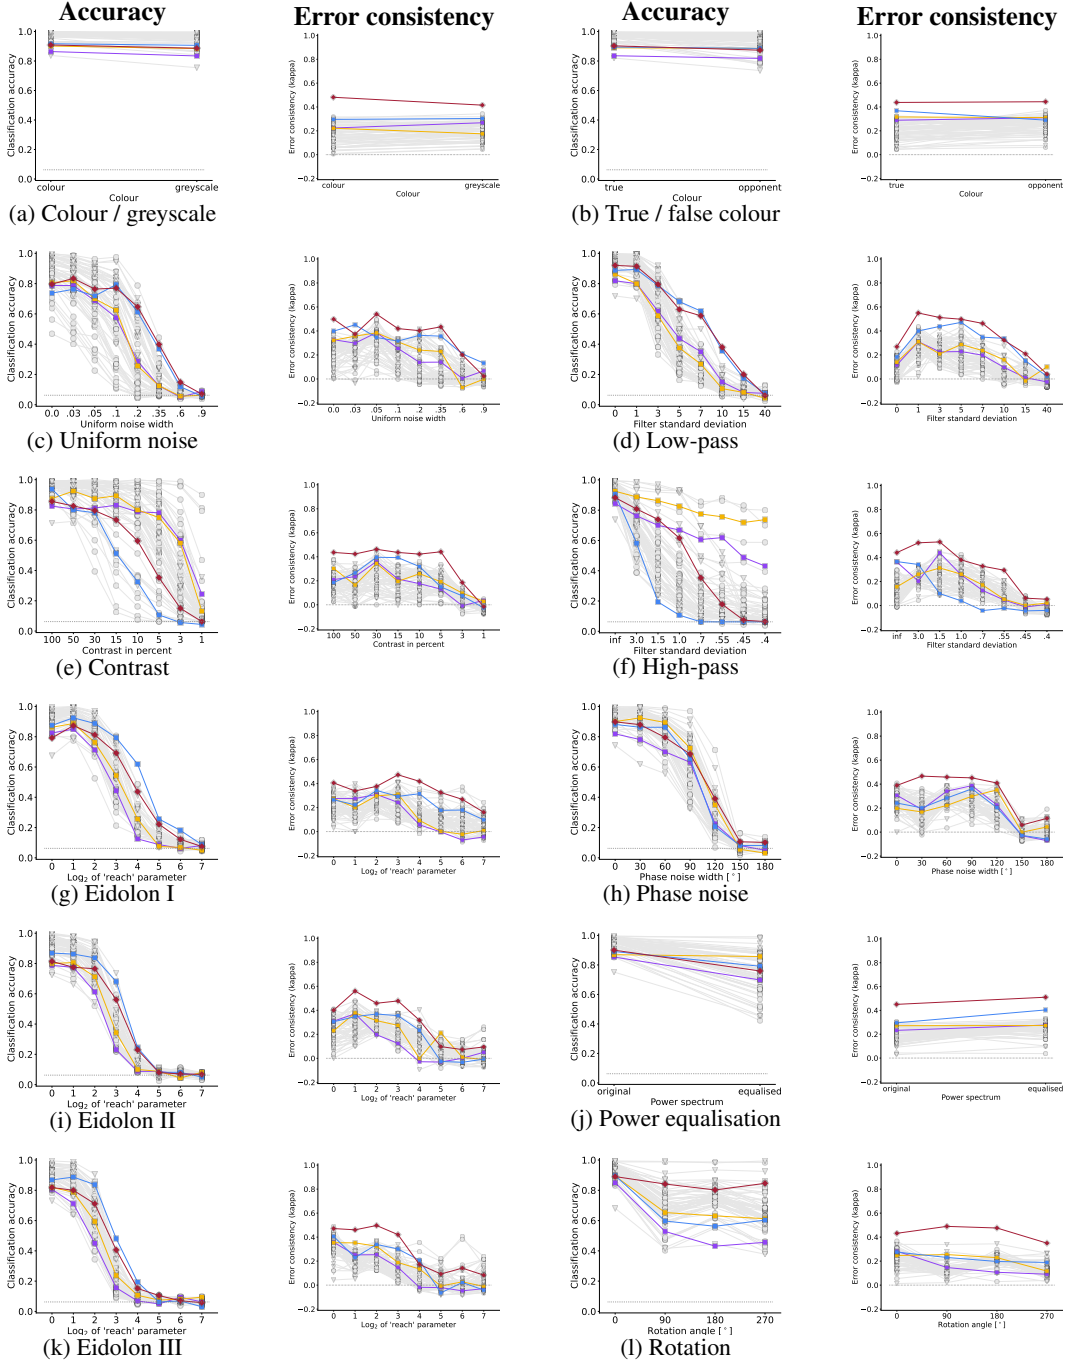

Figure 10: OOD accuracy and error consistency across all twelve parametric datasets from Geirhos et al. (2021). Error consistency results for nonparametric datasets are plotted in Figures 6 and 14 to 17.

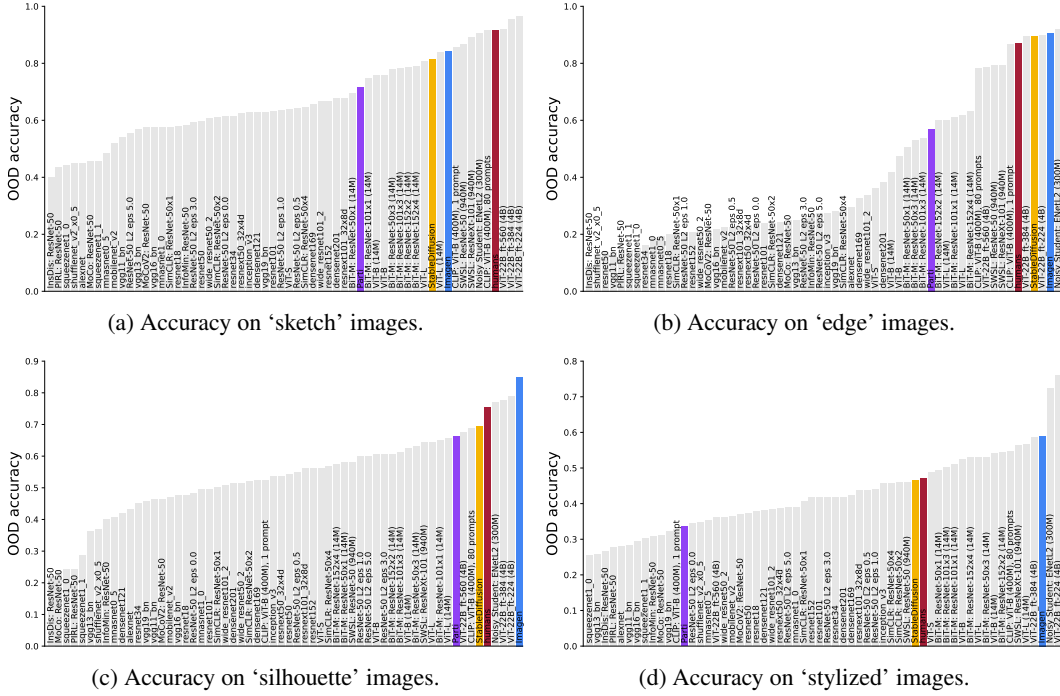

Figure 11: OOD accuracy on all four nonparametric datasets (i.e., datasets with only a single corruption type and strength).

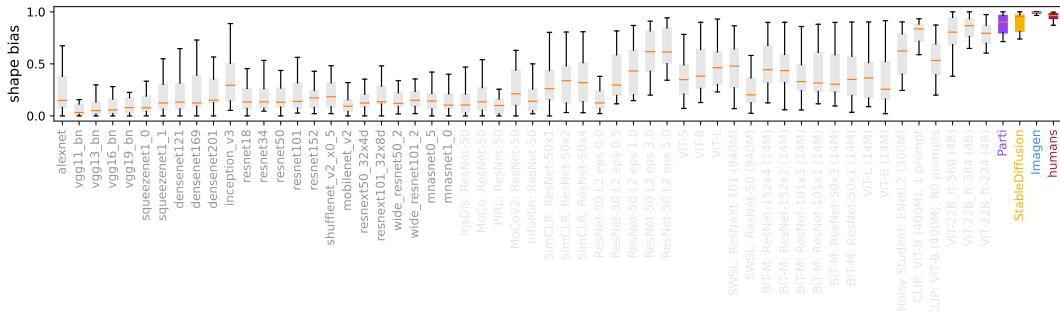

Figure 12: Zero-shot generative classifiers achieve a **human-level shape bias**: 99% for **Imagen**, 93% for **Stable Diffusion**, 92% for **Parti** and 92–99% for individual **human observers** (96% on average). This figure shows boxplots highlighting the spread across 16 categories for each model as a different way of visualizing the data from Figure 1.



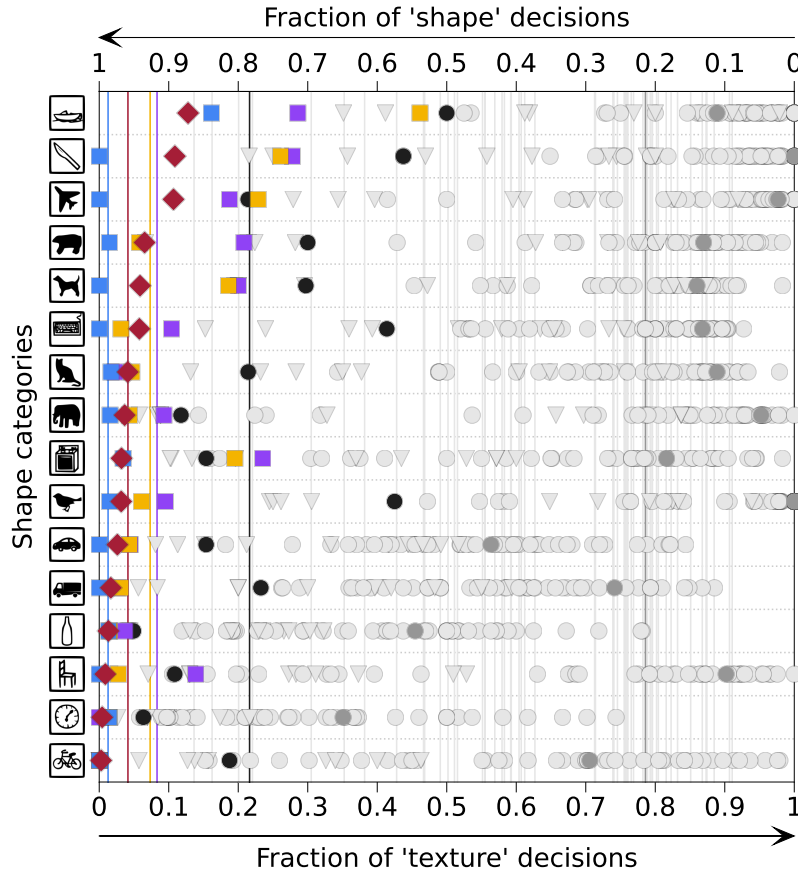

Figure 13: Shape bias before and after training with diffusion noise: This figure shows how ResNet-50 shape bias increases from 21% for a vanilla model (dark grey circles) to 78% when trained and evaluated with diffusion noise (black circles). Horizontal lines indicate the average shape bias across categories. Other models as in Figure 12.

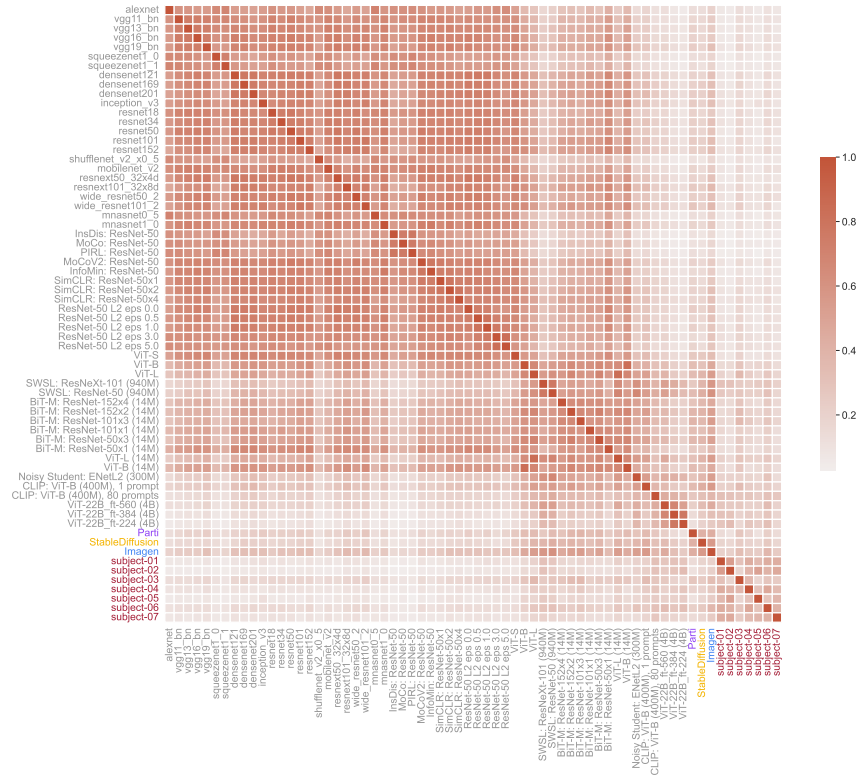

Figure 14: Error consistency for 'sketch' images.

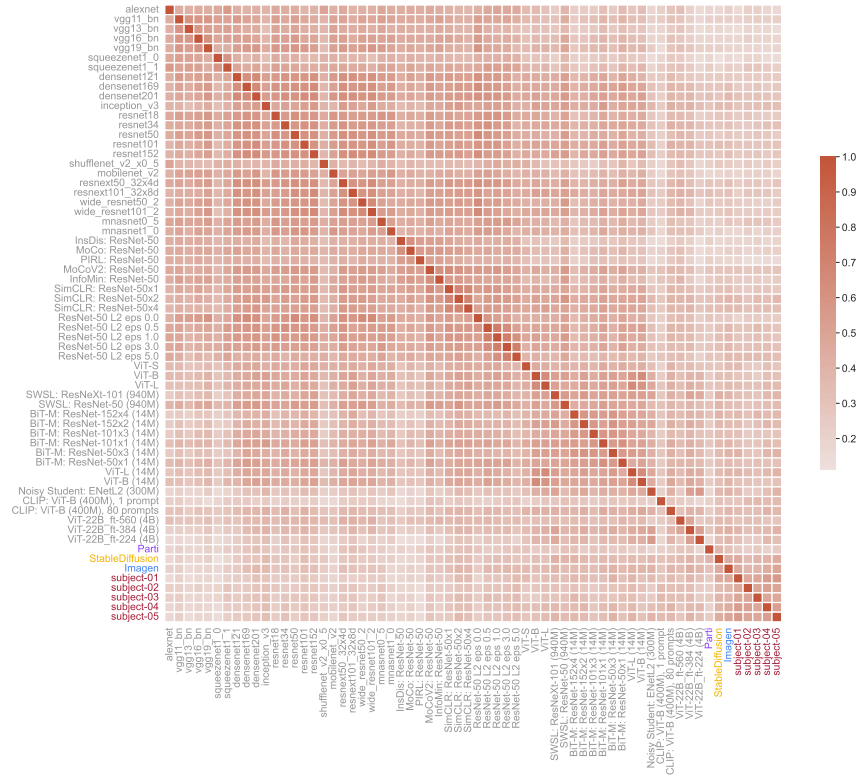

Figure 15: Error consistency for 'stylized' images.



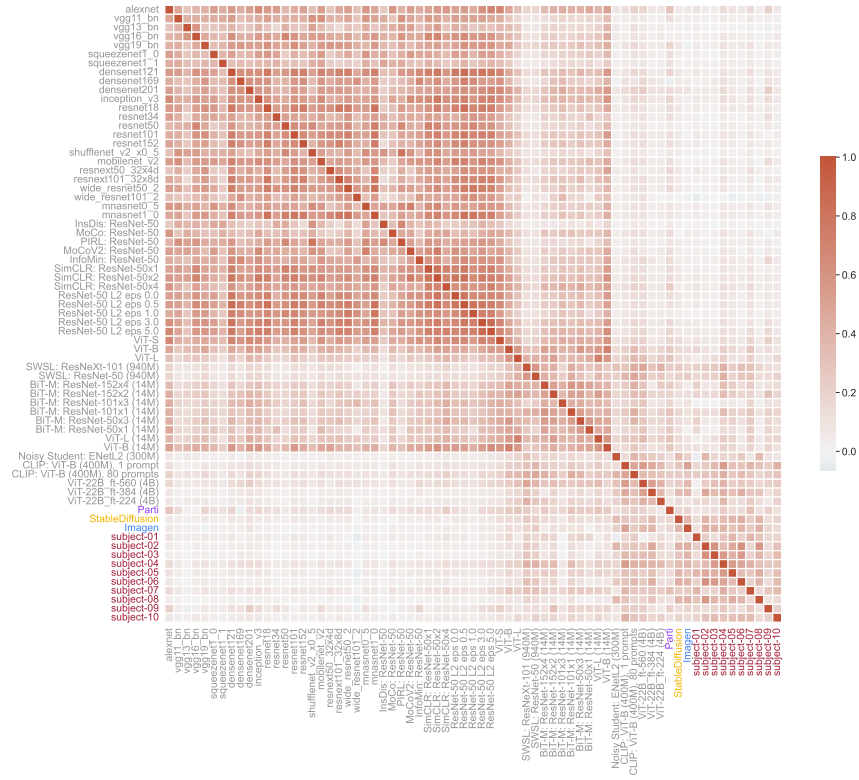

Figure 16: Error consistency for ‘edge’ images.

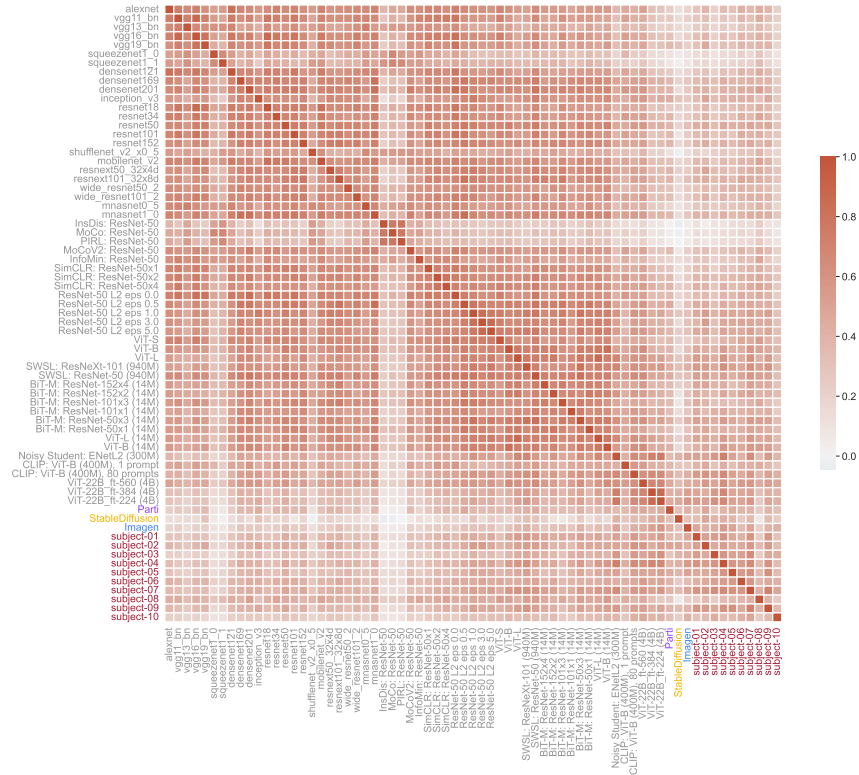

Figure 17: Error consistency for ‘silhouette’ images.

Table 2: Benchmark table of model results for most human-like behaviour, aggregated over all 17 datasets from Geirhos et al. (2021). The three metrics “accuracy difference” “observed consistency” and “error consistency” each produce a different model ranking. The mean rank of a model across those three metrics is used to rank the models on our benchmark.

| model                          | accuracy diff. ↓ | obs. consistency ↑ | error consistency ↑ | mean rank ↓  |
|--------------------------------|------------------|--------------------|---------------------|--------------|
| ViT-22B_ft-384 (4B)            | <b>0.018</b>     | <b>0.783</b>       | 0.258               | <b>2.333</b> |
| Imagen (860M)                  | 0.023            | 0.761              | <b>0.309</b>        | 3.000        |
| ViT-22B_ft-560 (4B)            | 0.022            | 0.739              | 0.281               | 4.333        |
| CLIP: ViT-B (400M), 80 prompts | 0.023            | 0.758              | 0.281               | 4.333        |
| StableDiffusion                | 0.023            | 0.743              | 0.264               | 5.000        |
| SWSL: ResNeXt-101 (940M)       | 0.028            | 0.752              | 0.237               | 8.000        |
| BiT-M: ResNet-101x1 (14M)      | 0.034            | 0.733              | 0.252               | 9.333        |
| BiT-M: ResNet-152x2 (14M)      | 0.035            | 0.737              | 0.243               | 10.000       |
| ViT-L                          | 0.033            | 0.738              | 0.222               | 11.667       |
| BiT-M: ResNet-152x4 (14M)      | 0.035            | 0.732              | 0.233               | 12.667       |
| ViT-L (14M)                    | 0.035            | 0.744              | 0.206               | 14.000       |
| ViT-22B_ft-224 (4B)            | 0.030            | 0.781              | 0.197               | 14.000       |
| BiT-M: ResNet-50x3 (14M)       | 0.040            | 0.726              | 0.228               | 14.333       |
| BiT-M: ResNet-50x1 (14M)       | 0.042            | 0.718              | 0.240               | 14.667       |
| CLIP: ViT-B (400M), 1 prompt   | 0.054            | 0.688              | 0.257               | 16.000       |
| SWSL: ResNet-50 (940M)         | 0.041            | 0.727              | 0.211               | 16.667       |
| ViT-B                          | 0.044            | 0.719              | 0.223               | 17.000       |
| BiT-M: ResNet-101x3 (14M)      | 0.040            | 0.720              | 0.204               | 19.333       |
| ViT-B (14M)                    | 0.049            | 0.717              | 0.209               | 20.000       |
| densenet201                    | 0.060            | 0.695              | 0.212               | 20.333       |
| Noisy Student: ENetL2 (300M)   | 0.040            | 0.764              | 0.169               | 22.333       |
| ViT-S                          | 0.066            | 0.684              | 0.216               | 22.333       |
| densenet169                    | 0.065            | 0.688              | 0.207               | 23.000       |
| inception_v3                   | 0.066            | 0.677              | 0.211               | 23.333       |
| ResNet-50 L2 eps 1.0           | 0.079            | 0.669              | 0.224               | 26.667       |
| ResNet-50 L2 eps 3.0           | 0.079            | 0.663              | 0.239               | 27.667       |
| SimCLR: ResNet-50x4            | 0.071            | 0.698              | 0.179               | 30.333       |
| wide_resnet101_2               | 0.068            | 0.676              | 0.187               | 30.333       |
| ResNet-50 L2 eps 0.5           | 0.078            | 0.668              | 0.203               | 31.000       |
| densenet121                    | 0.077            | 0.671              | 0.200               | 31.000       |
| SimCLR: ResNet-50x2            | 0.073            | 0.686              | 0.180               | 31.333       |
| resnet152                      | 0.077            | 0.675              | 0.190               | 31.667       |
| resnet101                      | 0.074            | 0.671              | 0.192               | 31.667       |
| resnext101_32x8d               | 0.074            | 0.674              | 0.182               | 32.667       |
| ResNet-50 L2 eps 5.0           | 0.087            | 0.649              | 0.240               | 32.667       |
| resnet50                       | 0.087            | 0.665              | 0.208               | 34.333       |
| resnet34                       | 0.084            | 0.662              | 0.205               | 35.000       |
| vgg19_bn                       | 0.081            | 0.660              | 0.200               | 35.667       |
| resnext50_32x4d                | 0.079            | 0.666              | 0.184               | 36.333       |
| SimCLR: ResNet-50x1            | 0.080            | 0.667              | 0.179               | 38.000       |
| resnet18                       | 0.091            | 0.648              | 0.201               | 40.333       |
| vgg16_bn                       | 0.088            | 0.651              | 0.198               | 40.333       |
| wide_resnet50_2                | 0.084            | 0.663              | 0.176               | 41.667       |
| MoCoV2: ResNet-50              | 0.083            | 0.660              | 0.177               | 42.000       |
| mobilenet_v2                   | 0.092            | 0.645              | 0.196               | 43.000       |
| ResNet-50 L2 eps 0.0           | 0.086            | 0.654              | 0.178               | 43.333       |
| mnasnet1_0                     | 0.092            | 0.646              | 0.189               | 44.333       |
| vgg11_bn                       | 0.106            | 0.635              | 0.193               | 44.667       |
| InfoMin: ResNet-50             | 0.086            | 0.659              | 0.168               | 45.333       |
| vgg13_bn                       | 0.101            | 0.631              | 0.180               | 47.000       |
| mnasnet0_5                     | 0.110            | 0.617              | 0.173               | 51.000       |
| MoCo: ResNet-50                | 0.107            | 0.617              | 0.149               | 53.000       |
| alexnet                        | 0.118            | 0.597              | 0.165               | 53.333       |
| squeezenet1_1                  | 0.131            | 0.593              | 0.175               | 53.667       |
| PIRL: ResNet-50                | 0.119            | 0.607              | 0.141               | 54.667       |
| shufflenet_v2_x0.5             | 0.126            | 0.592              | 0.160               | 55.333       |
| InsDis: ResNet-50              | 0.131            | 0.593              | 0.138               | 56.667       |
| squeezenet1_0                  | 0.145            | 0.574              | 0.153               | 57.000       |

Table 3: Benchmark table of model results for highest out-of-distribution robustness, aggregated over all 17 datasets from Geirhos et al. (2021).

| model                          | OOD accuracy $\uparrow$ | rank $\downarrow$ |
|--------------------------------|-------------------------|-------------------|
| ViT-22B_ft-224 (4B)            | <b>0.837</b>            | <b>1.000</b>      |
| Noisy Student: ENetL2 (300M)   | 0.829                   | 2.000             |
| ViT-22B_ft-384 (4B)            | 0.798                   | 3.000             |
| ViT-L (14M)                    | 0.733                   | 4.000             |
| CLIP: ViT-B (400M), 80 prompts | 0.708                   | 5.000             |
| Imagen (860M)                  | 0.706                   | 6.000             |
| ViT-L                          | 0.706                   | 7.000             |
| SWSL: ResNeXt-101 (940M)       | 0.698                   | 8.000             |
| BiT-M: ResNet-152x2 (14M)      | 0.694                   | 9.000             |
| StableDiffusion                | 0.689                   | 10.000            |
| BiT-M: ResNet-152x4 (14M)      | 0.688                   | 11.000            |
| BiT-M: ResNet-101x3 (14M)      | 0.682                   | 12.000            |
| BiT-M: ResNet-50x3 (14M)       | 0.679                   | 13.000            |
| SimCLR: ResNet-50x4            | 0.677                   | 14.000            |
| SWSL: ResNet-50 (940M)         | 0.677                   | 15.000            |
| BiT-M: ResNet-101x1 (14M)      | 0.672                   | 16.000            |
| ViT-B (14M)                    | 0.669                   | 17.000            |
| ViT-B                          | 0.658                   | 18.000            |
| BiT-M: ResNet-50x1 (14M)       | 0.654                   | 19.000            |
| SimCLR: ResNet-50x2            | 0.644                   | 20.000            |
| ViT-22B_ft-560 (4B)            | 0.639                   | 21.000            |
| densenet201                    | 0.621                   | 22.000            |
| densenet169                    | 0.613                   | 23.000            |
| SimCLR: ResNet-50x1            | 0.596                   | 24.000            |
| resnext101_32x8d               | 0.594                   | 25.000            |
| resnet152                      | 0.584                   | 26.000            |
| wide_resnet101_2               | 0.583                   | 27.000            |
| resnet101                      | 0.583                   | 28.000            |
| ViT-S                          | 0.579                   | 29.000            |
| densenet121                    | 0.576                   | 30.000            |
| MoCoV2: ResNet-50              | 0.571                   | 31.000            |
| inception_v3                   | 0.571                   | 32.000            |
| InfoMin: ResNet-50             | 0.571                   | 33.000            |
| resnext50_32x4d                | 0.569                   | 34.000            |
| wide_resnet50_2                | 0.566                   | 35.000            |
| resnet50                       | 0.559                   | 36.000            |
| resnet34                       | 0.553                   | 37.000            |
| ResNet-50 L2 eps 0.5           | 0.551                   | 38.000            |
| CLIP: ViT-B (400M), 1 prompt   | 0.550                   | 39.000            |
| ResNet-50 L2 eps 1.0           | 0.547                   | 40.000            |
| vgg19_bn                       | 0.546                   | 41.000            |
| ResNet-50 L2 eps 0.0           | 0.545                   | 42.000            |
| ResNet-50 L2 eps 3.0           | 0.530                   | 43.000            |
| vgg16_bn                       | 0.530                   | 44.000            |
| mnasnet1_0                     | 0.524                   | 45.000            |
| resnet18                       | 0.521                   | 46.000            |
| mobilenet_v2                   | 0.520                   | 47.000            |
| MoCo: ResNet-50                | 0.502                   | 48.000            |
| ResNet-50 L2 eps 5.0           | 0.501                   | 49.000            |
| vgg13_bn                       | 0.499                   | 50.000            |
| vgg11_bn                       | 0.498                   | 51.000            |
| PIRL: ResNet-50                | 0.489                   | 52.000            |
| mnasnet0.5                     | 0.472                   | 53.000            |
| InsDis: ResNet-50              | 0.468                   | 54.000            |
| shufflenet_v2_x0.5             | 0.440                   | 55.000            |
| alexnet                        | 0.434                   | 56.000            |
| squeezenet1_1                  | 0.425                   | 57.000            |
| squeezenet1_0                  | 0.401                   | 58.000            |
